# Supplementary material
Source: PubMed Central journal article supplement (PMC3416634)
Supplement: AEM.01255-12_zam999103555so1.pdf [file AEM.01255-12_zam999103555so1.pdf]

Microsatellite markers for the characterization of native and introduced populations of *Plasmopara viticola*, the causal agent of grapevine downy mildew

Mélanie Rouxel, Daciana Papura, Marilise Nogueira, Virginie Machefer, Damien Dezette, Sylvie Richard-Cervera, Sébastien Carrere, Pere Mestre, and François Delmotte

Table S1: Date of collection and geographical origin of *Plasmopara viticola* strains and populations analysed in this study.

| Sample name        | Number of isolates | Year | Location     | Country        | GPS position       |                    |
|--------------------|--------------------|------|--------------|----------------|--------------------|--------------------|
| <b>Strains</b>     |                    |      |              |                |                    |                    |
| Pv221              | 1                  | 2009 | Blanquefort  | France         | N 44° 55' 14.4336" | W 0° 38' 30.5916"  |
| SC                 | 1                  | 2005 | Colmar       | France         | N 48° 3' 51.3396"  | E 7° 20' 2.5044"   |
| SL                 | 1                  | 2008 | Lednice      | Czech Republic | N 48° 47' 28.6044" | E 16° 47' 42.4278" |
| <b>Populations</b> |                    |      |              |                |                    |                    |
| Gironde            | 16                 | 2003 | Sauternes    | France         | N 44° 31' 59.466"  | W 0° 19' 58.1874"  |
| Rhine Valley       | 16                 | 2003 | Freibourg    | Germany        | N 47° 58' 27.6672" | E 7° 48' 16.704"   |
| Vaucluse           | 16                 | 2005 | Sorgues      | France         | N 44° 1' 51.0846"  | E 4° 51' 41.8968"  |
| Michigan           | 16                 | 2010 | Fennville    | USA            | N 42° 35' 59.9208" | W 86° 9' 13.7514"  |
| Virginia           | 16                 | 2010 | Hidden Brook | USA            | N 39° 12' 18.6366" | W 77° 29' 57.861"  |
| New York           | 16                 | 2010 | Geneva       | USA            | N 42° 52' 12.525"  | W 77° 2' 38.5368"  |
