# Supplementary material
Source: PubMed Central journal article supplement (PMC3416634)
Supplement: AEM.01255-12_zam999103555so2.pdf [file AEM.01255-12_zam999103555so2.pdf]

Microsatellite markers for the characterization of native and introduced populations of *Plasmopara viticola*, the causal agent of grapevine downy mildew

Mélanie Rouxel, Daciana Papura, Marilise Nogueira, Virginie Machefer, Damien Dezette, Sylvie Richard-Cervera, Sébastien Carrere, Pere Mestre, and François Delmotte

Table S2: Sequencing summary information for the different methods used for SSR discovery.

| Method* | Isolate | Number of reads | Total length (Mb) | Average read length (nt) |
|---------|---------|-----------------|-------------------|--------------------------|
| MEP     | Pv221   | 33,057          | 6.6               | 199                      |
| DSPg    | Pv221   | 391,760         | 130               | 333                      |
| DSPc    | SC      | 369,105         | 69                | 187                      |
| DSPc    | SL      | 419,725         | 139.5             | 333                      |

\*Method of identification: MEP: Microsatellite-Enriched Pyrosequencing; DSPg: Direct Shotgun Pyrosequencing of genomic DNA; DSPc: Direct Shotgun Pyrosequencing of cDNA
